# Supplementary material for: A luminescent Zn(ii) coordination polymer based on a new tetrazolyl–benzimidazolyl tripodal heterotopic ligand for detecting acetone and triethylamine in water
Source: Royal Society of Chemistry journal article supplement (doi:10.1039/d4ce00445k), 2024-01-01
Supplement: d4ce00445k1.pdf [file d4ce00445k1.pdf]

# A luminescent Zn(II) coordination polymer based on a new tetrazolyl-benzimidazolyl tripodal heterotopic ligand for detecting acetone and triethylamine in water

Jia-Xuan Wu,<sup>a, ‡</sup> Yi-Hong Mo,<sup>a, ‡</sup> Xian Lin,<sup>a</sup> Bing-Xun Zhou,<sup>a</sup> Song-Liang Cai,<sup>a, \*</sup> Jun Fan,<sup>a, b</sup> Mu-Biao Xie,<sup>c</sup> Sheng-Run Zheng<sup>a, \*</sup>

<sup>a</sup>*School of Chemistry, Guangzhou Key Laboratory of Analytical Chemistry for Biomedicine, South China Normal University, Guangzhou, 510006, P. R. China.*

<sup>b</sup>*Guangdong Longsmall BioChem Technology Co. Ltd, Qingyuan, 511500, China*

<sup>c</sup>*School of Chemistry and Chemical Engineering, Lingnan Normal University, Zhanjiang, 524048, China*

<sup>‡</sup>*These authors contributed equally to the work.*

\* Corresponding author: Prof. Sheng-Run Zheng; Prof. Song-Liang Cai

E-mail address: [zhengsr@scnu.edu.cn](mailto:zhengsr@scnu.edu.cn); [ssongliangcai@m.scnu.edu.cn](mailto:ssongliangcai@m.scnu.edu.cn)

Tel./Fax.: +86-20-39310187

## Supporting Information

**Table S1** Crystallographic data and structure refinement summary for Zn-DTPB

| Complex                                        | Zn-DTPB                                             |
|------------------------------------------------|-----------------------------------------------------|
| Empirical formula                              | C <sub>18</sub> H <sub>15</sub> N <sub>11</sub> OZn |
| Formula weight                                 | 466.78                                              |
| Crystal system                                 | Monoclinic                                          |
| Space group                                    | <i>P</i> 2 <sub>1</sub> /c                          |
| <i>a</i> / Å                                   | 9.5220(2)                                           |
| <i>b</i> / Å                                   | 19.44852(5)                                         |
| <i>c</i> / Å                                   | 10.4691(2)                                          |
| $\alpha$ / °                                   | 90                                                  |
| $\beta$ / °                                    | 103.7040(10)                                        |
| $\gamma$ / °                                   | 90                                                  |
| <i>V</i> / Å <sup>3</sup>                      | 1887.12(7)                                          |
| <i>Z</i>                                       | 4                                                   |
| <i>D</i> / g cm <sup>-3</sup>                  | 1.643                                               |
| $\mu$ / mm <sup>-1</sup>                       | 2.146                                               |
| <i>T</i> / K                                   | 150(2)                                              |
| <i>R</i> <sup>a</sup> / <i>wR</i> <sup>b</sup> | 0.0723 / 0.1866                                     |
| Total / unique                                 | 15665 / 3865                                        |

<sup>a</sup>  $R_1 = \Sigma ||F_o| - |F_c|| / \Sigma |F_o|$ , <sup>b</sup>  $wR_2 = [\Sigma w(F_o^2 - F_c^2)^2 / \Sigma w(F_o^2)^2]^{1/2}$ , where  $w = 1 / [\sigma^2(F_o^2) + (aP)_2 + bP]$ .  $P = (F_o^2 + 2F_c^2) / 3$ .

**Table S2** Selected bond lengths [ $\text{\AA}$ ] and angles [ $^\circ$ ] for Zn-DTPB

| Zn-DTPB                                    |            |                                            |            |
|--------------------------------------------|------------|--------------------------------------------|------------|
| Zn(1)-N(3) <sup>1</sup>                    | 2.014(2)   | Zn(1)-N(1)                                 | 1.981(3)   |
| Zn(1)-N(5) <sup>2</sup>                    | 1.993(2)   | Zn(1)-N(9) <sup>3</sup>                    | 1.995(3)   |
| N(1)-Zn(1)-N(3) <sup>1</sup>               | 106.57(11) | N(1)-Zn(1)-N(5) <sup>2</sup>               | 120.04(11) |
| N(1)-Zn(1)-N(9) <sup>3</sup>               | 106.97(10) | N(5) <sup>2</sup> -Zn(1)-N(3) <sup>1</sup> | 110.46(10) |
| N(5) <sup>2</sup> -Zn(1)-N(9) <sup>3</sup> | 108.05(10) | N(9) <sup>3</sup> -Zn(1)-N(3) <sup>1</sup> | 103.49(10) |

Symmetry transformations used to generate equivalent atoms: <sup>1</sup>-1 + x, y, z; <sup>2</sup>-1 + x, 1/2 - y, 1/2 + z; <sup>3</sup>-x, 1 - y, 1 - z.

**Table S3** Comparisons of the acetone sensing performances of Zn-DTPB and reported MOFs.

| MOFs                                                                                                                                                                                                          | Detection medium   | fluorescence quenching efficiencies (65%) | fluorescence quenching efficiencies (85%) | References                                                          |
|---------------------------------------------------------------------------------------------------------------------------------------------------------------------------------------------------------------|--------------------|-------------------------------------------|-------------------------------------------|---------------------------------------------------------------------|
| Zn-DTPB                                                                                                                                                                                                       | H <sub>2</sub> O   | 0.52%                                     | 1.47%                                     | This work                                                           |
| [Cd <sub>2</sub> (btec)(TPB) <sub>0.5</sub> (H <sub>2</sub> O) <sub>4</sub> ] $\cdot$ 2H <sub>2</sub> O                                                                                                       | H <sub>2</sub> O   | 1.9%                                      | 4.5%                                      | <i>Inorg. Chem. Front.</i> , 2021, <b>8</b> , 3096–3104             |
| [Zn <sub>6</sub> (1,4-bpeb) <sub>4</sub> (IPA) <sub>6</sub> (H <sub>2</sub> O)] <sub>n</sub>                                                                                                                  | H <sub>2</sub> O   | 0.75%                                     | 1.59%                                     | <i>Molecules</i> , 2023, <b>28</b> , 7315.                          |
| Tb(BTC)(H <sub>2</sub> O) <sub>6</sub>                                                                                                                                                                        | H <sub>2</sub> O   | 1.11%                                     | 2.79%                                     | <i>J. Mater. Chem.</i> , 2012, <b>22</b> , 6819-6823                |
| Eu(BTC) (MOF-76)                                                                                                                                                                                              | 1-propanol         | 0.58%                                     | 1.18%                                     | <i>Adv. Mater.</i> , 2007, <b>19</b> , 1693-1696                    |
| [Tb <sub>4</sub> ( $\mu_6$ -L) <sub>2</sub> ( $\mu$ -HCOO)( $\mu_3$ -OH) <sub>3</sub> ( $\mu_3$ -O)(DMF) <sub>2</sub> (H <sub>2</sub> O) <sub>4</sub> ] <sub>n</sub> $\cdot$ (H <sub>2</sub> O) <sub>4n</sub> | DMF                | 21%                                       | 60%                                       | <i>ACS Appl. Mater. Interfaces.</i> , 2018, <b>10</b> , 23976-23986 |
| [Cd <sub>3</sub> (tib) <sub>2</sub> (BTB) <sub>2</sub> ] $\cdot$ 3DEF $\cdot$ 4.5H <sub>2</sub> O                                                                                                             | CH <sub>3</sub> CN | 0.81%                                     | 1.44%                                     | <i>Inorg. Chem.</i> , 2016, <b>55</b> , 11821-11830                 |
| [Cd <sub>3</sub> (tib) <sub>2</sub> (BTB) <sub>2</sub> (DMA) <sub>2</sub> (H <sub>2</sub> O) <sub>2</sub> ] $\cdot$ 2DMA $\cdot$ 8H <sub>2</sub> O                                                            | CH <sub>3</sub> CN | 0.86%                                     | 1.50%                                     | <i>Inorg. Chem.</i> , 2016, <b>55</b> , 11821-11830                 |
| Yb(BPT)(H <sub>2</sub> O) (DMF) <sub>1.5</sub> (H <sub>2</sub> O) <sub>1.25</sub>                                                                                                                             | 1-propanol         | 0.75%                                     | 3.85%                                     | <i>Chem. Commun.</i> , 2011, <b>47</b> , 5551-5553                  |
| {[Cd <sub>3</sub> (L)(H <sub>2</sub> O) <sub>2</sub> (DMF) <sub>2</sub> ] $\cdot$ 5DMF} <sub>n</sub>                                                                                                          | 1-propanol         | 2.79%                                     | 5.40%                                     | <i>J. Mater. Chem.</i> , 2012, <b>22</b> , 23201-23209              |
| {[Cd <sub>3</sub> (L)(dib)] $\cdot$ 3H <sub>2</sub> O $\cdot$ 5DMA} <sub>n</sub>                                                                                                                              | 1-propanol         | 2.83%                                     | 4.89%                                     | <i>J. Mater. Chem.</i> , 2012, <b>22</b> , 23201-23209              |
| [Cu(dmpy) <sub>3</sub> (H <sub>2</sub> O) <sub>2</sub> ](H <sub>2</sub> O)(ClO <sub>4</sub> ) <sub>2</sub> *                                                                                                  | Acetonitrile       | 0.0002%                                   | 0.0004%                                   | <i>RSC Adv.</i> , 2020, <b>10</b> , 42137-42146                     |

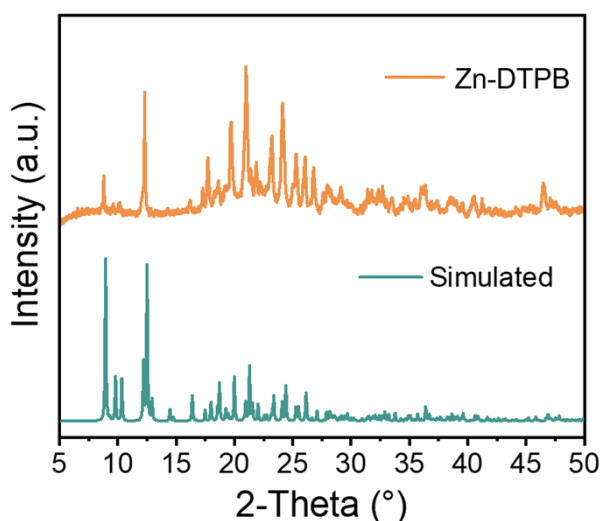**Fig. S1** PXRD of simulated and as-synthesized Zn-DTPB.

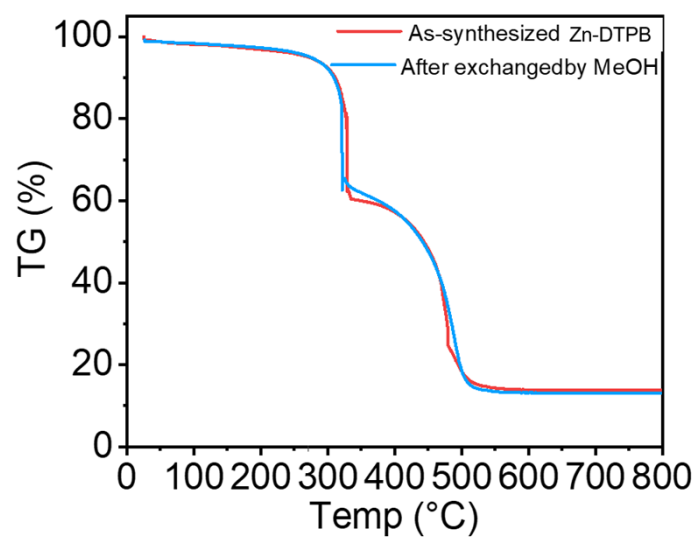

**Fig. S2** TG curve of Zn-DTPB before and after immersing in water.

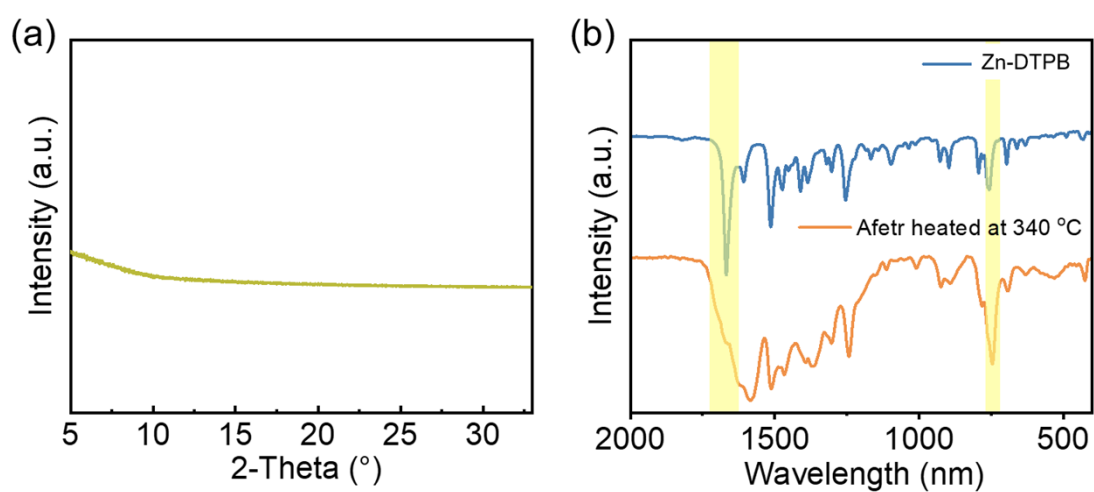

**Fig. S3** (a) PXRD of Zn-DTPB after heated at 340 °C. (b) IR of Zn-DTPB before and after heated at 340 °C.

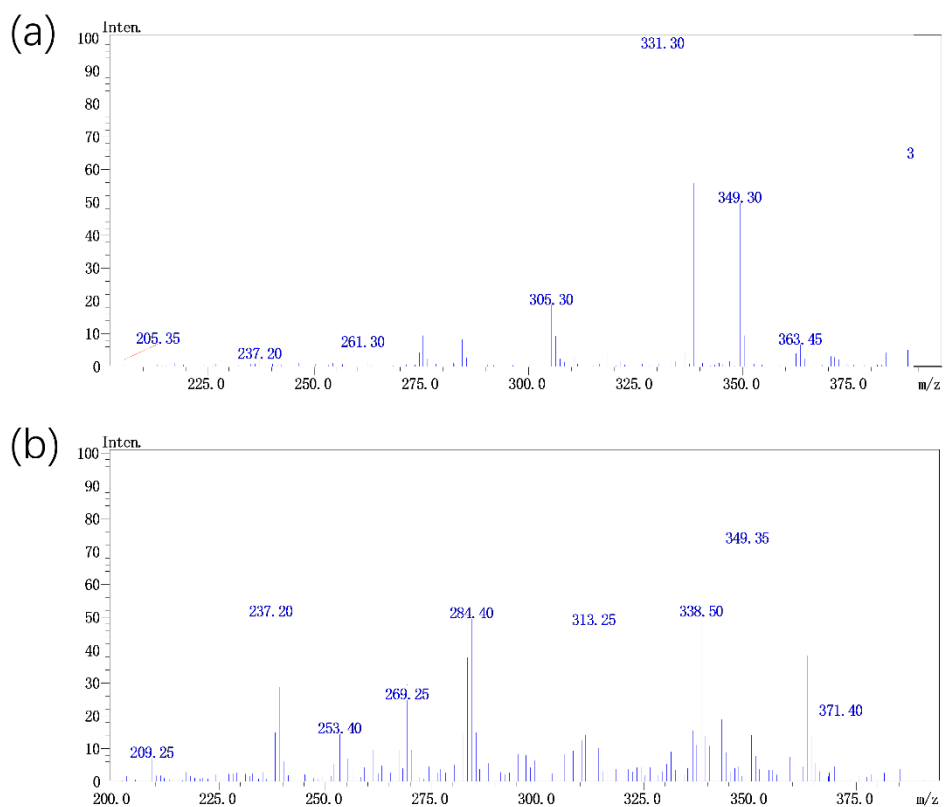

**Fig. S4** MS spectra of (a) as-synthesized Zn-DTPB and (b) Zn-DTPB after heating at 340 °C that were digested by HCl.

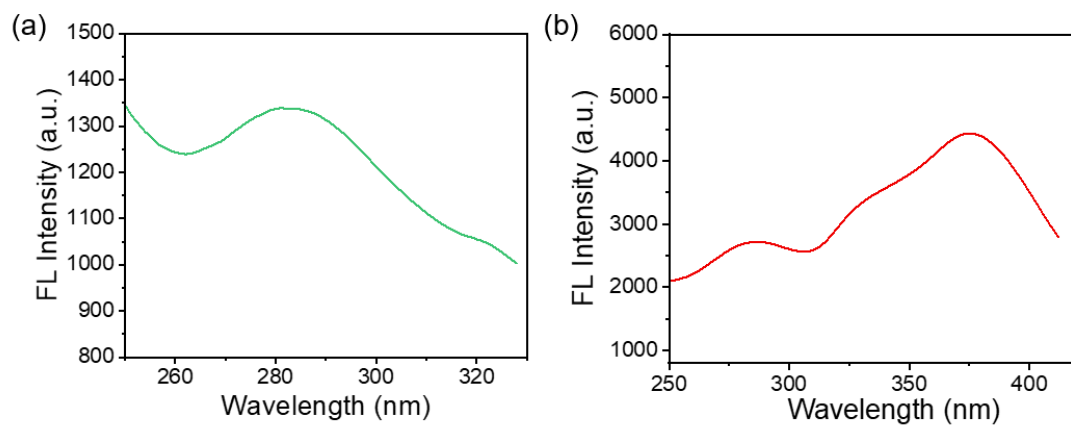

**Fig. S5** Excitation spectra of (a) H<sub>2</sub>DBPT and (b) Zn-DTPB.

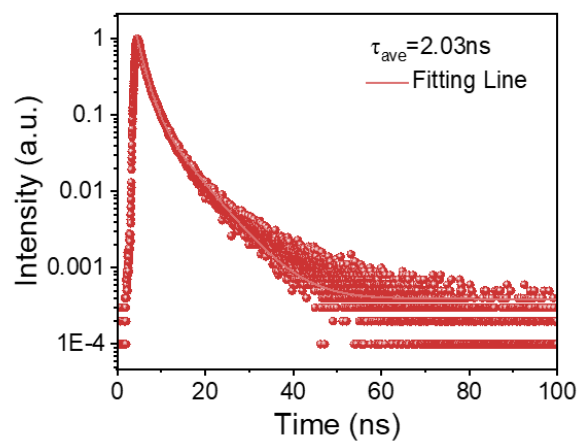

**Fig. S6** Time-resolved fluorescence spectra of Zn-DTPB.

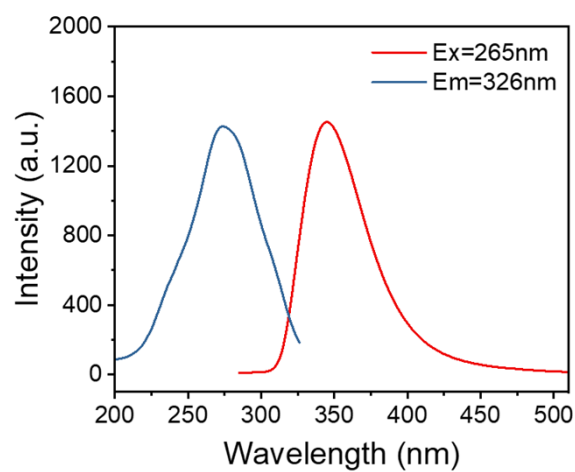

**Fig. S7** Fluorescent excitation and emission spectra of Zn-DTPB after dispersed in water.

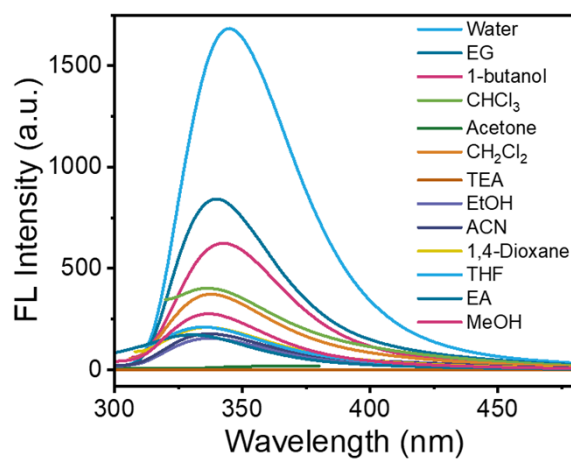

**Fig. S8** Fluorescent spectra of Zn-DTPB after dispersed in various solvents.

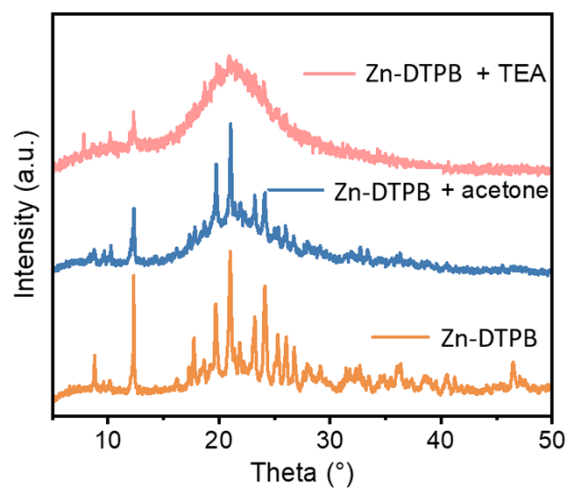

**Fig. S9** The PXRD patterns of Zn-DTPB before and after sensing acetone and TEA.

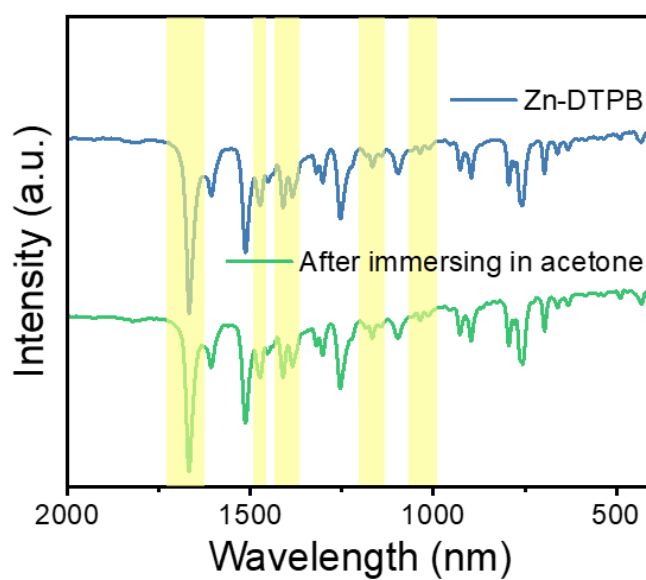

**Fig. S10** The IR spectra of Zn-DTPB before and after immersing in acetone.

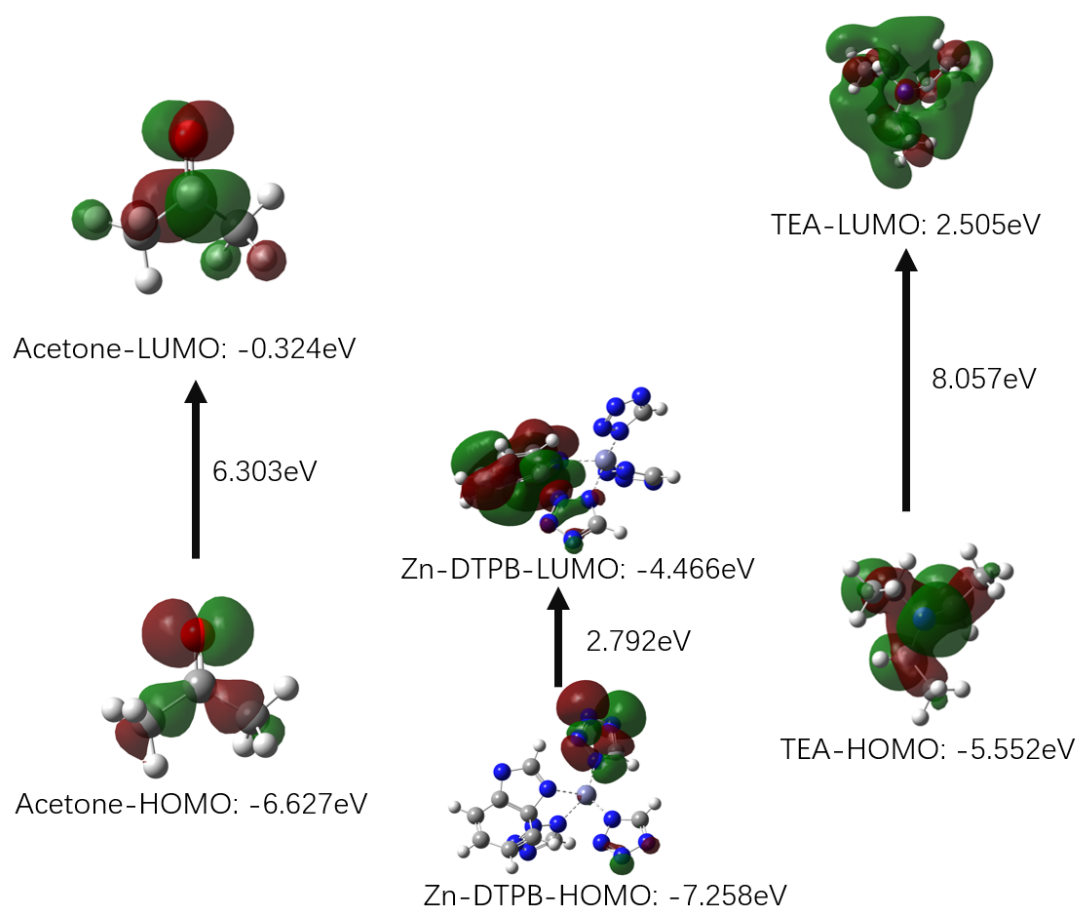

**Fig. S11** HOMO and LUMO energy level diagram for the acetone, Zn-DTPB, and TEA.

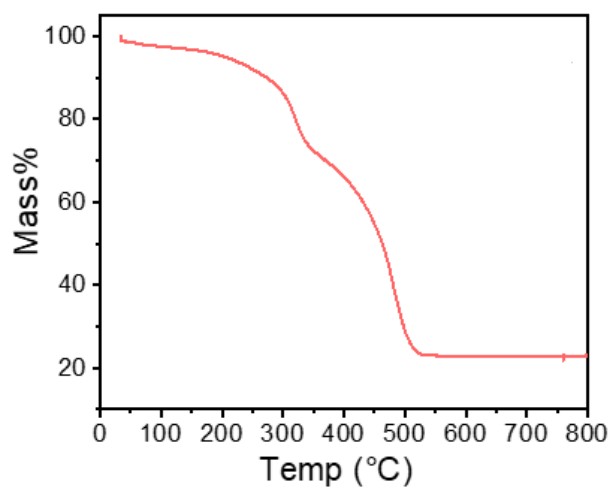

**Fig. S12** The TG curve of *a*Zn-DTPB.

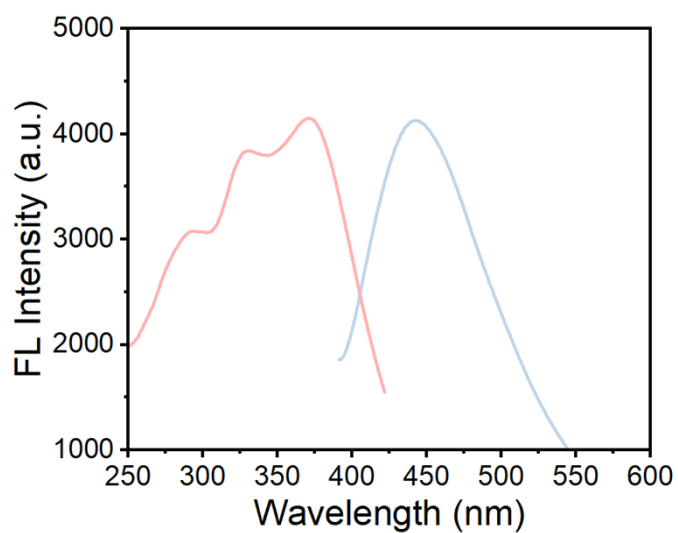

**Fig. S13** Solid-state fluorescent excitation and emission spectra of aZn-DTPB.

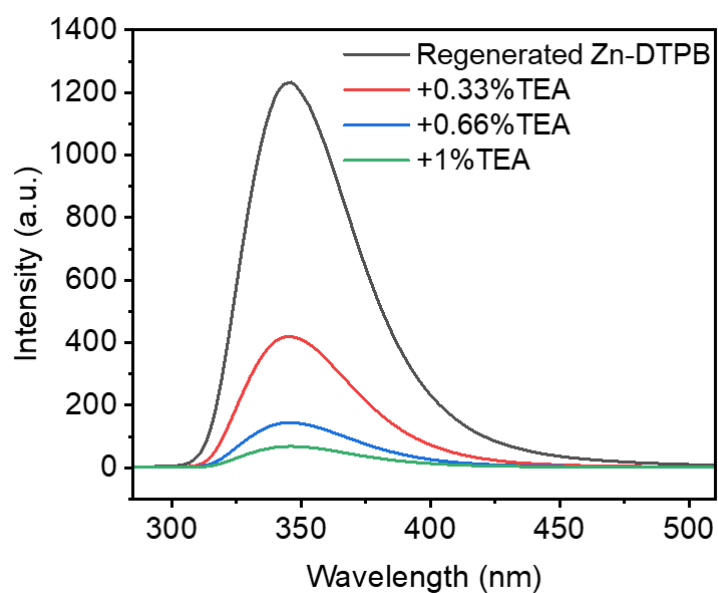

**Fig. S14** Fluorescence spectra of a suspension of Zn-DTPB regenerated from aZn-DTPB with the addition of 0% to 1% (Vol%) TEA.
